# Supplementary material for: Targeting Neurological Manifestations of Coronaviruses by Candidate Phytochemicals: A Mechanistic Approach
Source: Front Pharmacol. 2021 Jan 20;11:621099. doi: 10.3389/fphar.2020.621099 (PMC7941749; doi:10.3389/fphar.2020.621099)
Supplement: Supplementary file 1 [file table1.xlsx]

## Sheet: Sheet1
Inhibitory effects	Phytochemical class	Compound	SMILES	Formula	MW	#Heavy atoms	#Aromatic heavy atoms	Fraction Csp3	#Rotatable bonds	#H-bond acceptors	#H-bond donors	MR	TPSA	iLOGP	XLOGP3	WLOGP	MLOGP	Silicos-IT Log P	Consensus Log P	ESOL Log S	ESOL Solubility (mg/ml)	ESOL Solubility (mol/l)	ESOL Class	Ali Log S	Ali Solubility (mg/ml)	Ali Solubility (mol/l)	Ali Class	Silicos-IT LogSw	Silicos-IT Solubility (mg/ml)	Silicos-IT Solubility (mol/l)	Silicos-IT class	GI absorption	BBB permeant	Pgp substrate	CYP1A2 inhibitor	CYP2C19 inhibitor	CYP2C9 inhibitor	CYP2D6 inhibitor	CYP3A4 inhibitor	log Kp (cm/s)	Lipinski #violations	Ghose #violations	Veber #violations	Egan #violations	Muegge #violations	Bioavailability Score	PAINS #alerts	Brenk #alerts	Leadlikeness #violations
ACE2 interaction	Flavonoid	Chrysin	C1=CC=C(C=C1)C2=CC(=O)C3=C(C=C(C=C3O2)O)O	C15H10O4	254.24	19	16	0.00	1	4	2	71.97	70.67	2.27	3.52	2.87	1.08	3.02	2.55	-4.19	1.64e-02	6.44e-05	Moderately soluble	-4.69	5.22e-03	2.05e-05	Moderately soluble	-4.98	2.64e-03	1.04e-05	Moderately soluble	High	Yes	No	Yes	No	No	Yes	Yes	-5.35	0	0	0	0	0	0.55	0	0	1
ACE2 interaction	Quinone	Dithymoquinone	CC(C)C1=CC(=O)C2(C(C1=O)C3(C2C(=O)C(=CC3=O)C(C)C)C)C	C20H24O4	328.40	24	0	0.60	2	4	0	91.24	68.28	2.46	2.07	2.71	1.74	4.11	2.62	-3.05	2.94e-01	8.95e-04	Soluble	-3.13	2.42e-01	7.36e-04	Soluble	-4.18	2.19e-02	6.67e-05	Moderately soluble	High	Yes	No	No	No	No	No	No	-6.83	0	0	0	0	0	0.55	0	0	0
ACE2 interaction	Polyphenol	Resveratrol	C1=CC(=CC=C1C=CC2=CC(=CC(=C2)O)O)O	C14H12O3	228.24	17	12	0.00	2	3	3	67.88	60.69	1.71	3.13	2.76	2.26	2.57	2.48	-3.62	5.51e-02	2.41e-04	Soluble	-4.07	1.93e-02	8.44e-05	Moderately soluble	-3.29	1.18e-01	5.16e-04	Soluble	High	Yes	No	Yes	No	Yes	No	Yes	-5.47	0	0	0	0	0	0.55	0	1	1
ACE2 interaction	Flavonoid	Baicalin	C1=CC=C(C=C1)C2=CC(=O)C3=C(C(=C(C=C3O2)OC4C(C(C(C(O4)C(=O)O)O)O)O)O)O	C21H18O11	446.36	32	16	0.24	4	11	6	106.72	187.12	1.59	1.11	0.14	-1.63	-0.10	0.22	-3.41	1.73e-01	3.87e-04	Soluble	-4.63	1.04e-02	2.33e-05	Moderately soluble	-2.22	2.67e+00	5.98e-03	Soluble	Low	No	Yes	No	No	No	No	No	-8.23	2	0	1	1	3	0.11	1	1	1
ACE2 interaction	Polyphenol	Curcumin	COC1=C(C=CC(=C1)C=CC(=O)CC(=O)C=CC2=CC(=C(C=C2)O)OC)O	C21H20O6	368.38	27	12	0.14	8	6	2	102.80	93.06	3.27	3.20	3.15	1.47	4.04	3.03	-3.94	4.22e-02	1.15e-04	Soluble	-4.83	5.50e-03	1.49e-05	Moderately soluble	-4.45	1.31e-02	3.56e-05	Moderately soluble	High	No	No	No	No	Yes	No	Yes	-6.28	0	0	0	0	0	0.55	0	2	2
ACE2 interaction	Terpenoid	Glycyrrhizin	CC1(C2CCC3(C(C2(CCC1OC4C(C(C(C(O4)C(=O)O)O)O)OC5C(C(C(C(O5)C(=O)O)O)O)O)C)C(=O)C=C6C3(CCC7(C6CC(CC7)(C)C(=O)O)C)C)C)C	C42H62O16	822.93	58	0	0.86	7	16	8	202.84	267.04	2.15	2.80	2.25	0.02	0.52	1.55	-6.24	4.69e-04	5.70e-07	Poorly soluble	-8.06	7.09e-06	8.62e-09	Poorly soluble	-1.39	3.38e+01	4.10e-02	Soluble	Low	No	Yes	No	No	No	No	No	-9.33	3	3	1	1	4	0.11	0	1	1
ACE2 interaction	Flavonoid	Hesperetin	COC1=C(C=C(C=C1)C2CC(=O)C3=C(C=C(C=C3O2)O)O)O	C16H14O6	302.28	22	12	0.19	2	6	3	78.06	96.22	2.24	2.60	2.19	0.41	2.08	1.91	-3.62	7.19e-02	2.38e-04	Soluble	-4.27	1.62e-02	5.37e-05	Moderately soluble	-3.53	8.84e-02	2.92e-04	Soluble	High	No	Yes	Yes	No	No	No	Yes	-6.30	0	0	0	0	0	0.55	0	0	0
ACE2 interaction	Flavonoid	Kaempferol	C1=CC(=CC=C1C2=C(C(=O)C3=C(C=C(C=C3O2)O)O)O)O	C15H10O6	286.24	21	16	0.00	1	6	4	76.01	111.13	1.70	1.90	2.28	-0.03	2.03	1.58	-3.31	1.40e-01	4.90e-04	Soluble	-3.86	3.98e-02	1.39e-04	Soluble	-3.82	4.29e-02	1.50e-04	Soluble	High	No	No	Yes	No	No	Yes	Yes	-6.70	0	0	0	0	0	0.55	0	0	0
ACE2 interaction	Flavonoid	Naringenin	C1C(OC2=CC(=CC(=C2C1=O)O)O)C3=CC=C(C=C3)O	C15H12O5	272.25	20	12	0.13	1	5	3	71.57	86.99	1.75	2.52	2.19	0.71	2.05	1.84	-3.49	8.74e-02	3.21e-04	Soluble	-3.99	2.77e-02	1.02e-04	Soluble	-3.42	1.04e-01	3.82e-04	Soluble	High	No	Yes	Yes	No	No	No	Yes	-6.17	0	0	0	0	0	0.55	0	0	0
ACE2 interaction	Alkaloid	Nicotianamine	C1CN(C1C(=O)O)CCC(C(=O)O)NCCC(C(=O)O)N	C12H21N3O6	303.31	21	0	0.75	10	9	5	75.32	153.19	0.85	-8.21	-2.00	-5.99	-1.58	-3.38	4.11	3.92e+06	1.29e+04	Highly soluble	5.75	1.71e+08	5.64e+05	Highly soluble	0.67	1.40e+03	4.62e+00	Soluble	Low	No	Yes	No	No	No	No	No	-13.98	0	1	1	1	2	0.55	0	0	1
ACE2 interaction	Terpenoid	Nimbin	CC1=C2C(CC1C3=COC=C3)OC4C2(C(C5(C(C4OC(=O)C)C(C=CC5=O)(C)C(=O)OC)C)CC(=O)OC)C	C30H36O9	540.60	39	5	0.60	8	9	0	138.81	118.34	3.95	2.28	3.92	2.04	3.96	3.23	-4.20	3.45e-02	6.38e-05	Moderately soluble	-4.40	2.14e-02	3.96e-05	Moderately soluble	-5.44	1.97e-03	3.64e-06	Moderately soluble	High	No	No	No	No	No	No	No	-7.98	1	3	0	0	0	0.55	0	2	2
ACE2 interaction	Polyphenol	Piceatannol	C1=CC(=C(C=C1C=CC2=CC(=CC(=C2)O)O)O)O	C14H12O4	244.24	18	12	0.00	2	4	4	69.90	80.92	1.61	2.86	2.46	1.67	2.08	2.14	-3.52	7.42e-02	3.04e-04	Soluble	-4.22	1.48e-02	6.05e-05	Moderately soluble	-2.71	4.75e-01	1.95e-03	Soluble	High	No	No	Yes	No	Yes	No	Yes	-5.76	0	0	0	0	0	0.55	1	2	1
ACE2 interaction	Flavonoid	Quercetin	C1=CC(=C(C=C1C2=C(C(=O)C3=C(C=C(C=C3O2)O)O)O)O)O	C15H10O7	302.24	22	16	0.00	1	7	5	78.03	131.36	1.63	1.54	1.99	-0.56	1.54	1.23	-3.16	2.11e-01	6.98e-04	Soluble	-3.91	3.74e-02	1.24e-04	Soluble	-3.24	1.73e-01	5.73e-04	Soluble	High	No	No	Yes	No	No	Yes	Yes	-7.05	0	0	0	0	0	0.55	1	1	0
ACE2 interaction	Flavonoid	Scutellarin	C1=CC(=CC=C1C2=CC(=O)C3=C(C(=C(C=C3O2)OC4C(C(C(C(O4)C(=O)O)O)O)O)O)O)O	C21H18O12	462.36	33	16	0.24	4	12	7	108.74	207.35	1.11	0.75	-0.15	-2.12	-0.57	-0.20	-3.27	2.46e-01	5.32e-04	Soluble	-4.68	9.58e-03	2.07e-05	Moderately soluble	-1.63	1.08e+01	2.33e-02	Soluble	Low	No	Yes	No	No	No	No	No	-8.59	2	0	1	1	3	0.11	1	1	1
Main protease inhibitors	Terpenoid	1,8-cineole	CC1(C2CCC(O1)(CC2)C)C	C10H18O	154.25	11	0	1.00	0	1	0	47.12	9.23	2.58	2.74	2.74	2.45	2.86	2.67	-2.52	4.63e-01	3.00e-03	Soluble	-2.59	3.98e-01	2.58e-03	Soluble	-2.45	5.45e-01	3.53e-03	Soluble	High	Yes	No	No	No	No	No	No	-5.30	0	1	0	0	2	0.55	0	0	1
Main protease inhibitors	Alkaloid	Berberine	COC1=C(C2=C[N+]3=C(C=C2C=C1)C4=CC5=C(C=C4CC3)OCO5)OC	C20H18NO4	336.36	25	16	0.25	2	4	0	94.87	40.80	-0.00	3.62	3.10	2.19	3.74	2.53	-4.55	9.53e-03	2.83e-05	Moderately soluble	-4.16	2.30e-02	6.85e-05	Moderately soluble	-5.92	4.00e-04	1.19e-06	Moderately soluble	High	Yes	Yes	Yes	No	No	Yes	Yes	-5.78	0	0	0	0	0	0.55	0	1	1
Main protease inhibitors	Lignan	Savinin	C1C(C(=CC2=CC3=C(C=C2)OCO3)C(=O)O1)CC4=CC5=C(C=C4)OCO5	C20H16O6	352.34	26	12	0.25	3	6	0	91.54	63.22	2.86	3.62	2.83	2.63	4.14	3.22	-4.45	1.25e-02	3.56e-05	Moderately soluble	-4.64	8.16e-03	2.32e-05	Moderately soluble	-5.32	1.68e-03	4.76e-06	Moderately soluble	High	Yes	No	Yes	Yes	Yes	Yes	Yes	-5.88	0	0	0	0	0	0.55	0	1	2
Main protease inhibitors	Quinone	Tanshinone I	CC1=C2C=CC3=C(C2=CC=C1)C(=O)C(=O)C4=C3OC=C4C	C18H12O3	276.29	21	15	0.11	0	3	0	80.24	47.28	2.44	3.69	4.10	1.82	4.95	3.40	-4.41	1.08e-02	3.92e-05	Moderately soluble	-4.37	1.17e-02	4.23e-05	Moderately soluble	-6.91	3.44e-05	1.24e-07	Poorly soluble	High	Yes	No	Yes	Yes	No	No	Yes	-5.37	0	0	0	0	0	0.55	2	1	1
Main protease inhibitors	Alkaloid	Triptanthrin	C1=CC=C2C(=C1)C(=O)N3C4=CC=CC=C4C(=O)C3=N2	C15H8N2O2	248.24	19	16	0.00	0	3	0	70.77	51.96	1.95	2.05	1.93	2.22	2.63	2.16	-3.29	1.26e-01	5.08e-04	Soluble	-2.77	4.22e-01	1.70e-03	Soluble	-5.09	2.00e-03	8.07e-06	Moderately soluble	High	Yes	No	Yes	No	No	No	No	-6.36	0	0	0	0	0	0.55	0	0	1
Main protease inhibitors	Flavonoid	Amentoflavone	C1=CC(=CC=C1C2=CC(=O)C3=C(O2)C(=C(C=C3O)O)C4=C(C=CC(=C4)C5=CC(=O)C6=C(C=C(C=C6O5)O)O)O)O	C30H18O10	538.46	40	32	0.00	3	10	6	146.97	181.80	3.06	5.04	5.13	0.25	4.61	3.62	-6.75	9.63e-05	1.79e-07	Poorly soluble	-8.60	1.36e-06	2.52e-09	Poorly soluble	-8.70	1.07e-06	1.98e-09	Poorly soluble	Low	No	No	No	No	No	No	No	-6.01	2	2	1	1	3	0.17	0	0	2
Main protease inhibitors	Terpenoid	Andrographolide	CC12CCC(C(C1CCC(=C)C2CC=C3C(COC3=O)O)(C)CO)O	C20H30O5	350.45	25	0	0.75	3	5	3	95.21	86.99	2.45	2.16	1.96	1.98	2.94	2.30	-3.18	2.34e-01	6.67e-04	Soluble	-3.62	8.42e-02	2.40e-04	Soluble	-2.69	7.22e-01	2.06e-03	Soluble	High	No	Yes	No	No	No	No	No	-6.90	0	0	0	0	0	0.55	0	2	1
Main protease inhibitors	Flavonoid	Apigenin	C1=CC(=CC=C1C2=CC(=O)C3=C(C=C(C=C3O2)O)O)O	C15H10O5	270.24	20	16	0.00	1	5	3	73.99	90.90	1.89	3.02	2.58	0.52	2.52	2.11	-3.94	3.07e-02	1.14e-04	Soluble	-4.59	6.88e-03	2.55e-05	Moderately soluble	-4.40	1.07e-02	3.94e-05	Moderately soluble	High	No	No	Yes	No	No	Yes	Yes	-5.80	0	0	0	0	0	0.55	0	0	0
Main protease inhibitors	Terpenoid	Betulinic acid	CC(=C)C1CCC2(C1C3CCC4C5(CCC(C(C5CCC4(C3(CC2)C)C)(C)C)O)C)C(=O)O	C30H48O3	456.70	33	0	0.90	2	3	2	136.91	57.53	3.68	8.21	7.09	5.82	5.75	6.11	-7.71	8.87e-06	1.94e-08	Poorly soluble	-9.28	2.40e-07	5.26e-10	Poorly soluble	-5.70	9.09e-04	1.99e-06	Moderately soluble	Low	No	No	No	No	Yes	No	No	-3.26	1	3	0	1	1	0.85	0	1	2
Main protease inhibitors	Polyphenol	Dieckol	C1=C(C=C(C=C1O)OC2=C(C=C(C3=C2OC4=C(C=C(C=C4O3)OC5=C(C=C(C=C5O)OC6=C(C=C(C7=C6OC8=C(C=C(C=C8O7)O)O)O)O)O)O)O)O)O	C36H22O18	742.55	54	36	0.00	6	18	11	181.42	287.14	2.66	4.87	7.62	0.04	1.75	3.39	-7.61	1.83e-05	2.46e-08	Poorly soluble	-10.63	1.72e-08	2.32e-11	Insoluble	-6.32	3.55e-04	4.79e-07	Poorly soluble	Low	No	No	No	No	Yes	No	No	-7.37	3	4	1	2	5	0.17	0	0	2
Main protease inhibitors	Alkaloid	Fangchinoline	CN1CCC2=CC(=C3C=C2C1CC4=CC=C(C=C4)OC5=C(C=CC(=C5)CC6C7=C(O3)C(=C(C=C7CCN6C)OC)O)OC)OC	C37H40N2O6	608.72	45	24	0.35	3	8	1	181.60	72.86	5.02	6.34	5.45	3.55	5.50	5.17	-7.80	9.54e-06	1.57e-08	Poorly soluble	-7.66	1.33e-05	2.19e-08	Poorly soluble	-10.12	4.61e-08	7.57e-11	Insoluble	High	No	No	No	No	No	No	No	-5.51	1	3	0	0	2	0.55	0	0	2
Main protease inhibitors	Flavonoid	Fortunellin	CC1C(C(C(C(O1)OC2C(C(C(OC2OC3=CC(=C4C(=C3)OC(=CC4=O)C5=CC=C(C=C5)OC)O)CO)O)O)O)O)O	C28H32O14	592.55	42	16	0.46	7	14	7	141.80	217.97	1.31	1.05	-0.80	-2.76	-0.62	-0.36	-4.00	5.99e-02	1.01e-04	Soluble	-5.22	3.59e-03	6.05e-06	Moderately soluble	-2.16	4.06e+00	6.85e-03	Soluble	Low	No	Yes	No	No	No	No	Yes	-9.17	3	4	1	1	3	0.17	0	0	1
Main protease inhibitors	Polyphenol	Gallocatechin-3-gallate	C1C(C(OC2=CC(=CC(=C21)O)O)C3=CC(=C(C(=C3)O)O)O)OC(=O)C4=CC(=C(C(=C4)O)O)O	C22H18O11	458.37	33	18	0.14	4	11	8	112.06	197.37	1.83	1.17	1.91	-0.44	0.57	1.01	-3.56	1.27e-01	2.76e-04	Soluble	-4.91	5.64e-03	1.23e-05	Moderately soluble	-2.50	1.46e+00	3.18e-03	Soluble	Low	No	No	No	No	No	No	No	-8.27	2	0	1	1	3	0.17	1	1	1
Main protease inhibitors	Iridoid	Geniposide	COC(=O)C1=COC(C2C1CC=C2CO)OC3C(C(C(C(O3)CO)O)O)O	C17H24O10	388.37	27	0	0.71	6	10	5	86.89	155.14	2.22	-2.34	-2.23	-1.86	-1.91	-1.22	-0.38	1.63e+02	4.19e-01	Very soluble	-0.38	1.62e+02	4.16e-01	Very soluble	1.69	1.91e+04	4.91e+01	Soluble	Low	No	No	No	No	No	No	No	-10.33	0	1	1	1	2	0.11	0	1	1
Main protease inhibitors	Flavonoid	Hesperidin	CC1C(C(C(C(O1)OCC2C(C(C(C(O2)OC3=CC(=C4C(=O)CC(OC4=C3)C5=CC(=C(C=C5)OC)O)O)O)O)O)O)O)O	C28H34O15	610.56	43	12	0.54	7	15	8	141.41	234.29	2.60	-0.14	-1.48	-3.04	-1.55	-0.72	-3.28	3.19e-01	5.23e-04	Soluble	-4.33	2.88e-02	4.72e-05	Moderately soluble	-0.58	1.60e+02	2.62e-01	Soluble	Low	No	Yes	No	No	No	No	No	-10.12	3	4	1	1	4	0.17	0	0	1
Main protease inhibitors	Flavonoid	Isolophirachalcone A	C1=CC(=CC=C1CC2C(C(OC2C3=CC(=C(C=C3O)O)C(C4C(OC5=C4C=C(C=C5)C=CC(=O)C6=C(C=C(C=C6)O)O)C7=CC=C(C=C7)O)C8=C(C=C(C=C8)O)O)C9=CC=C(C=C9)O)C(=O)C1=C(C=C(C=C1)O)O)O	C60H48O15	1009.01	75	48	0.13	13	15	11	277.97	275.13	2.32	10.17	9.48	2.02	7.79	6.36	-12.12	7.68e-10	7.61e-13	Insoluble	-15.88	1.32e-13	1.31e-16	Insoluble	-12.93	1.18e-10	1.17e-13	Insoluble	Low	No	Yes	No	No	No	No	No	-5.23	3	4	2	2	6	0.17	0	1	3
Main protease inhibitors	Flavonoid	Luteolin	C1=CC(=C(C=C1C2=CC(=O)C3=C(C=C(C=C3O2)O)O)O)O	C15H10O6	286.24	21	16	0.00	1	6	4	76.01	111.13	1.86	2.53	2.28	-0.03	2.03	1.73	-3.71	5.63e-02	1.97e-04	Soluble	-4.51	8.84e-03	3.09e-05	Moderately soluble	-3.82	4.29e-02	1.50e-04	Soluble	High	No	No	Yes	No	No	Yes	Yes	-6.25	0	0	0	0	0	0.55	1	1	0
Main protease inhibitors	Flavonoid	Narcissin	CC1C(C(C(C(O1)OCC2C(C(C(C(O2)OC3=C(OC4=CC(=CC(=C4C3=O)O)O)C5=CC(=C(C=C5)O)OC)O)O)O)O)O)O	C28H32O16	624.54	44	16	0.46	7	16	9	145.85	258.43	2.62	-0.01	-1.38	-3.69	-1.55	-0.80	-3.51	1.92e-01	3.07e-04	Soluble	-4.97	6.73e-03	1.08e-05	Moderately soluble	-0.97	6.66e+01	1.07e-01	Soluble	Low	No	Yes	No	No	No	No	No	-10.12	3	4	1	1	4	0.17	0	0	1
Main protease inhibitors	Flavonoid	Oolonghomobisflavan-A	C1C(C(OC2=C1C(=CC(=C2CC3=C(C=C(C4=C3OC(C(C4)OC(=O)C5=CC(=C(C(=C5)O)O)O)C6=CC(=C(C(=C6)O)O)O)O)O)O)O)C7=CC(=C(C(=C7)O)O)O)OC(=O)C8=CC(=C(C(=C8)O)O)O	C45H36O22	928.75	67	36	0.16	10	22	16	227.14	394.74	2.60	4.46	3.72	-1.66	1.27	2.08	-8.15	6.64e-06	7.15e-09	Poorly soluble	-12.47	3.16e-10	3.40e-13	Insoluble	-4.97	9.95e-03	1.07e-05	Moderately soluble	Low	No	Yes	No	No	No	No	No	-8.80	3	3	1	1	5	0.17	1	2	3
Main protease inhibitors	Flavonoid	Papyriflavonol	CC(=CCC1=C(C(=CC(=C1)C2=C(C(=O)C3=C(O2)C=C(C(=C3O)CC=C(C)C)O)O)O)O)C	C25H26O7	438.47	32	16	0.24	5	7	5	125.48	131.36	3.69	6.02	5.01	1.56	5.08	4.27	-6.39	1.78e-04	4.06e-07	Poorly soluble	-8.56	1.22e-06	2.78e-09	Poorly soluble	-5.68	9.18e-04	2.09e-06	Moderately soluble	Low	No	No	Yes	No	No	No	No	-4.70	0	0	0	0	1	0.55	1	2	2
Main protease inhibitors	Flavonoid	Quercetin	C1=CC(=C(C=C1C2=C(C(=O)C3=C(C=C(C=C3O2)O)O)O)O)O	C15H10O7	302.24	22	16	0.00	1	7	5	78.03	131.36	1.63	1.54	1.99	-0.56	1.54	1.23	-3.16	2.11e-01	6.98e-04	Soluble	-3.91	3.74e-02	1.24e-04	Soluble	-3.24	1.73e-01	5.73e-04	Soluble	High	No	No	Yes	No	No	Yes	Yes	-7.05	0	0	0	0	0	0.55	1	1	0
Main protease inhibitors	Quinone	Rhein	C1=CC2=C(C(=C1)O)C(=O)C3=C(C2=O)C=C(C=C3O)C(=O)O	C15H8O6	284.22	21	12	0.00	1	6	3	70.75	111.90	1.37	2.23	1.57	0.29	1.96	1.48	-3.36	1.23e-01	4.33e-04	Soluble	-4.22	1.73e-02	6.09e-05	Moderately soluble	-3.46	9.79e-02	3.44e-04	Soluble	High	No	No	No	No	No	No	Yes	-6.45	0	0	0	0	0	0.56	1	0	0
Main protease inhibitors	Flavonoid	Rutin	CC1C(C(C(C(O1)OCC2C(C(C(C(O2)OC3=C(OC4=CC(=CC(=C4C3=O)O)O)C5=CC(=C(C=C5)O)O)O)O)O)O)O)O	C27H30O16	610.52	43	16	0.44	6	16	10	141.38	269.43	2.43	-0.33	-1.69	-3.89	-2.11	-1.12	-3.30	3.08e-01	5.05e-04	Soluble	-4.87	8.30e-03	1.36e-05	Moderately soluble	-0.29	3.15e+02	5.15e-01	Soluble	Low	No	Yes	No	No	No	No	No	-10.26	3	4	1	1	4	0.17	1	1	1
Main protease inhibitors	Alkaloid	Solanine	CC1CCC2C(C3C(N2C1)CC4C3(CCC5C4CC=C6C5(CCC(C6)OC7C(C(C(C(O7)CO)O)OC8C(C(C(C(O8)CO)O)O)O)OC9C(C(C(C(O9)C)O)O)O)C)C)C	C45H73NO15	868.06	61	0	0.96	8	16	9	222.19	240.69	4.75	1.81	-0.23	-1.14	-1.93	0.65	-5.83	1.27e-03	1.46e-06	Moderately soluble	-6.48	2.85e-04	3.28e-07	Poorly soluble	0.75	4.84e+03	5.57e+00	Soluble	Low	No	Yes	No	No	No	No	No	-10.31	3	3	1	1	5	0.17	0	1	2
RdRP blockers	Alkaloid	6-Acetonyldihydrochelerythrine	CC(=O)CC1C2=C(C=CC(=C2OC)OC)C3=C(N1C)C4=CC5=C(C=C4C=C3)OCO5	C24H23NO5	405.44	30	16	0.29	4	5	0	118.24	57.23	3.56	3.94	4.02	2.44	4.53	3.70	-4.97	4.38e-03	1.08e-05	Moderately soluble	-4.84	5.84e-03	1.44e-05	Moderately soluble	-7.02	3.86e-05	9.53e-08	Poorly soluble	High	Yes	Yes	Yes	Yes	Yes	Yes	Yes	-5.98	0	0	0	0	0	0.55	0	0	2
RdRP blockers	Alkaloid	Allocryptopine	CN1CCC2=CC3=C(C=C2C(=O)CC4=C(C1)C(=C(C=C4)OC)OC)OCO3	C21H23NO5	369.41	27	12	0.38	2	6	0	104.41	57.23	3.38	2.92	2.31	1.71	3.71	2.81	-4.17	2.52e-02	6.81e-05	Moderately soluble	-3.78	6.09e-02	1.65e-04	Soluble	-5.87	4.98e-04	1.35e-06	Moderately soluble	High	Yes	Yes	Yes	No	Yes	Yes	Yes	-6.48	0	0	0	0	0	0.55	0	0	1
RdRP blockers	Alkaloid	Protopine	CN1CCC2=CC3=C(C=C2C(=O)CC4=C(C1)C5=C(C=C4)OCO5)OCO3	C20H19NO5	353.37	26	12	0.35	0	6	0	97.49	57.23	3.19	2.79	2.02	1.90	3.47	2.67	-4.13	2.62e-02	7.41e-05	Moderately soluble	-3.65	7.94e-02	2.25e-04	Soluble	-5.38	1.48e-03	4.18e-06	Moderately soluble	High	Yes	Yes	Yes	No	Yes	Yes	Yes	-6.47	0	0	0	0	0	0.55	0	0	1
RdRP blockers	Polyphenol	Resveratrol	C1=CC(=CC=C1C=CC2=CC(=CC(=C2)O)O)O	C14H12O3	228.24	17	12	0.00	2	3	3	67.88	60.69	1.71	3.13	2.76	2.26	2.57	2.48	-3.62	5.51e-02	2.41e-04	Soluble	-4.07	1.93e-02	8.44e-05	Moderately soluble	-3.29	1.18e-01	5.16e-04	Soluble	High	Yes	No	Yes	No	Yes	No	Yes	-5.47	0	0	0	0	0	0.55	0	1	1
RdRP blockers	Alkaloid	Cepharanthine	CN1CCC2=CC3=C(C4=C2C1CC5=CC=C(C=C5)OC6=C(C=CC(=C6)CC7C8=CC(=C(C=C8CCN7C)OC)O4)OC)OCO3	C37H38N2O6	606.71	45	24	0.35	2	8	0	179.15	61.86	5.06	6.54	5.46	3.96	5.71	5.35	-7.98	6.29e-06	1.04e-08	Poorly soluble	-7.64	1.40e-05	2.31e-08	Poorly soluble	-10.32	2.88e-08	4.74e-11	Insoluble	High	No	No	No	No	No	No	No	-5.36	1	3	0	0	3	0.55	0	0	2
RdRP blockers	Flavonoid	Cyanidin	C1=CC(=C(C=C1C2=[O+]C3=CC(=CC(=C3C=C2O)O)O)O)O	C15H11O6	287.24	21	16	0.00	1	6	5	76.17	114.29	-2.59	1.94	2.91	0.32	0.24	0.56	-3.34	1.31e-01	4.56e-04	Soluble	-3.96	3.12e-02	1.09e-04	Soluble	-2.66	6.34e-01	2.21e-03	Soluble	High	No	Yes	Yes	No	No	No	No	-6.67	0	0	0	0	0	0.55	1	2	0
RdRP blockers	Flavonoid	Delphinidin	C1=C(C=C(C(=C1O)O)O)C2=C(C=C3C(=CC(=CC3=[O+]2)O)O)O	C15H11O7	303.24	22	16	0.00	1	7	6	78.20	134.52	-3.10	1.58	2.61	-0.22	-0.25	0.13	-3.19	1.97e-01	6.49e-04	Soluble	-4.02	2.92e-02	9.65e-05	Moderately soluble	-2.07	2.56e+00	8.43e-03	Soluble	High	No	Yes	Yes	No	No	No	No	-7.03	1	0	0	1	1	0.55	1	2	0
RdRP blockers	Polyphenol	Epigallocatechin gallate	C1C(C(OC2=CC(=CC(=C21)O)O)C3=CC(=C(C(=C3)O)O)O)OC(=O)C4=CC(=C(C(=C4)O)O)O	C22H18O11	458.37	33	18	0.14	4	11	8	112.06	197.37	1.83	1.17	1.91	-0.44	0.57	1.01	-3.56	1.27e-01	2.76e-04	Soluble	-4.91	5.64e-03	1.23e-05	Moderately soluble	-2.50	1.46e+00	3.18e-03	Soluble	Low	No	No	No	No	No	No	No	-8.27	2	0	1	1	3	0.17	1	1	1
RdRP blockers	Alkaloid	Fangchinoline	CN1CCC2=CC(=C3C=C2C1CC4=CC=C(C=C4)OC5=C(C=CC(=C5)CC6C7=C(O3)C(=C(C=C7CCN6C)OC)O)OC)OC	C37H40N2O6	608.72	45	24	0.35	3	8	1	181.60	72.86	5.02	6.34	5.45	3.55	5.50	5.17	-7.80	9.54e-06	1.57e-08	Poorly soluble	-7.66	1.33e-05	2.19e-08	Poorly soluble	-10.12	4.61e-08	7.57e-11	Insoluble	High	No	No	No	No	No	No	No	-5.51	1	3	0	0	2	0.55	0	0	2
RdRP blockers	Polyphenol	Gallic acid	C1=C(C=C(C(=C1O)O)O)C(=O)O	C7H6O5	170.12	12	6	0.00	1	5	4	39.47	97.99	0.21	0.70	0.50	-0.16	-0.20	0.21	-1.64	3.90e+00	2.29e-02	Very soluble	-2.34	7.86e-01	4.62e-03	Soluble	-0.04	1.55e+02	9.10e-01	Soluble	High	No	No	No	No	No	No	Yes	-6.84	0	2	0	0	1	0.56	1	1	1
RdRP blockers	Flavonoid	Hesperidin	CC1C(C(C(C(O1)OCC2C(C(C(C(O2)OC3=CC(=C4C(=O)CC(OC4=C3)C5=CC(=C(C=C5)OC)O)O)O)O)O)O)O)O	C28H34O15	610.56	43	12	0.54	7	15	8	141.41	234.29	2.60	-0.14	-1.48	-3.04	-1.55	-0.72	-3.28	3.19e-01	5.23e-04	Soluble	-4.33	2.88e-02	4.72e-05	Moderately soluble	-0.58	1.60e+02	2.62e-01	Soluble	Low	No	Yes	No	No	No	No	No	-10.12	3	4	1	1	4	0.17	0	0	1
RdRP blockers	Flavonoid	Isolophirachalcone A	C1=CC(=CC=C1CC2C(C(OC2C3=CC(=C(C=C3O)O)C(C4C(OC5=C4C=C(C=C5)C=CC(=O)C6=C(C=C(C=C6)O)O)C7=CC=C(C=C7)O)C8=C(C=C(C=C8)O)O)C9=CC=C(C=C9)O)C(=O)C1=C(C=C(C=C1)O)O)O	C60H48O15	1009.01	75	48	0.13	13	15	11	277.97	275.13	2.32	10.17	9.48	2.02	7.79	6.36	-12.12	7.68e-10	7.61e-13	Insoluble	-15.88	1.32e-13	1.31e-16	Insoluble	-12.93	1.18e-10	1.17e-13	Insoluble	Low	No	Yes	No	No	No	No	No	-5.23	3	4	2	2	6	0.17	0	1	3
RdRP blockers	Flavonoid	Myricetin	C1=C(C=C(C(=C1O)O)O)C2=C(C(=O)C3=C(C=C(C=C3O2)O)O)O	C15H10O8	318.24	23	16	0.00	1	8	6	80.06	151.59	1.08	1.18	1.69	-1.08	1.06	0.79	-3.01	3.14e-01	9.88e-04	Soluble	-3.96	3.50e-02	1.10e-04	Soluble	-2.66	6.98e-01	2.19e-03	Soluble	Low	No	No	Yes	No	No	No	Yes	-7.40	1	0	1	1	2	0.55	1	1	0
RdRP blockers	Alkaloid	Tetrandrine	CN1CCC2=CC(=C3C=C2C1CC4=CC=C(C=C4)OC5=C(C=CC(=C5)CC6C7=C(O3)C(=C(C=C7CCN6C)OC)OC)OC)OC	C38H42N2O6	622.75	46	24	0.37	4	8	0	186.07	61.86	5.16	6.66	5.75	3.73	6.06	5.47	-8.02	5.96e-06	9.57e-09	Poorly soluble	-7.76	1.08e-05	1.73e-08	Poorly soluble	-10.80	9.78e-09	1.57e-11	Insoluble	High	No	No	No	No	No	No	No	-5.37	1	4	0	0	2	0.55	0	0	2
RdRP blockers	Flavonoid	Theaflavin	C1C(C(OC2=CC(=CC(=C21)O)O)C3=CC4=C(C(=C(C=C4C5C(CC6=C(C=C(C=C6O5)O)O)O)O)O)C(=O)C(=C3)O)O	C29H24O12	564.49	41	23	0.21	2	12	9	143.98	217.60	1.84	2.38	1.56	-0.79	1.56	1.31	-5.12	4.26e-03	7.54e-06	Moderately soluble	-6.59	1.45e-04	2.57e-07	Poorly soluble	-4.22	3.39e-02	6.01e-05	Moderately soluble	Low	No	No	No	No	Yes	No	Yes	-8.05	3	2	1	1	3	0.17	1	1	1
Spike protein interaction	Terpenoid	Carvacrol	CC1=C(C=C(C=C1)C(C)C)O	C10H14O	150.22	11	6	0.40	1	1	1	48.01	20.23	2.24	3.49	2.82	2.76	2.79	2.82	-3.31	7.40e-02	4.92e-04	Soluble	-3.60	3.79e-02	2.53e-04	Soluble	-3.01	1.46e-01	9.71e-04	Soluble	High	Yes	No	Yes	No	No	No	No	-4.74	0	1	0	0	2	0.55	0	0	1
Spike protein interaction	Phenolic	Cinnamaldehyde	C1=CC=C(C=C1)C=CC=O	C9H8O	132.16	10	6	0.00	2	1	0	41.54	17.07	1.65	1.90	1.79	2.01	2.48	1.97	-2.17	8.97e-01	6.79e-03	Soluble	-1.88	1.74e+00	1.31e-02	Very soluble	-2.40	5.26e-01	3.98e-03	Soluble	High	Yes	No	No	No	No	No	No	-5.76	0	2	0	0	2	0.55	0	2	1
Spike protein interaction	Alkaloid	Piperine	C1CCN(CC1)C(=O)C=CC=CC2=CC3=C(C=C2)OCO3	C17H19NO3	285.34	21	6	0.35	4	3	0	85.47	38.77	3.42	3.46	2.51	2.39	3.41	3.04	-3.74	5.24e-02	1.84e-04	Soluble	-3.96	3.16e-02	1.11e-04	Soluble	-3.00	2.87e-01	1.00e-03	Soluble	High	Yes	No	Yes	Yes	Yes	No	No	-5.58	0	0	0	0	0	0.55	0	2	0
Spike protein interaction	Alkaloid	Thebaine	CN1CCC23C4C(=CC=C2C1CC5=C3C(=C(C=C5)OC)O4)OC	C19H21NO3	311.37	23	6	0.47	2	4	0	91.00	30.93	3.21	2.20	2.04	2.13	2.76	2.47	-3.22	1.89e-01	6.06e-04	Soluble	-2.48	1.02e+00	3.28e-03	Soluble	-3.89	3.99e-02	1.28e-04	Soluble	High	Yes	No	Yes	No	No	Yes	Yes	-6.64	0	0	0	0	0	0.55	0	0	0
Spike protein interaction	Alkaloid	Cepharanthine	CN1CCC2=CC3=C(C4=C2C1CC5=CC=C(C=C5)OC6=C(C=CC(=C6)CC7C8=CC(=C(C=C8CCN7C)OC)O4)OC)OCO3	C37H38N2O6	606.71	45	24	0.35	2	8	0	179.15	61.86	5.06	6.54	5.46	3.96	5.71	5.35	-7.98	6.29e-06	1.04e-08	Poorly soluble	-7.64	1.40e-05	2.31e-08	Poorly soluble	-10.32	2.88e-08	4.74e-11	Insoluble	High	No	No	No	No	No	No	No	-5.36	1	3	0	0	3	0.55	0	0	2
Spike protein interaction	Polyphenol	Curcumin	COC1=C(C=CC(=C1)C=CC(=O)CC(=O)C=CC2=CC(=C(C=C2)O)OC)O	C21H20O6	368.38	27	12	0.14	8	6	2	102.80	93.06	3.27	3.20	3.15	1.47	4.04	3.03	-3.94	4.22e-02	1.15e-04	Soluble	-4.83	5.50e-03	1.49e-05	Moderately soluble	-4.45	1.31e-02	3.56e-05	Moderately soluble	High	No	No	No	No	Yes	No	Yes	-6.28	0	0	0	0	0	0.55	0	2	2
Spike protein interaction	Quinone	Emodin	CC1=CC2=C(C(=C1)O)C(=O)C3=C(C2=O)C=C(C=C3O)O	C15H10O5	270.24	20	12	0.07	0	5	3	70.78	94.83	1.81	2.72	1.89	0.36	2.55	1.87	-3.67	5.74e-02	2.12e-04	Soluble	-4.37	1.17e-02	4.31e-05	Moderately soluble	-3.91	3.36e-02	1.24e-04	Soluble	High	No	No	Yes	No	No	No	Yes	-6.02	0	0	0	0	0	0.55	1	0	0
Spike protein interaction	Alkaloid	Fangchinoline	CN1CCC2=CC(=C3C=C2C1CC4=CC=C(C=C4)OC5=C(C=CC(=C5)CC6C7=C(O3)C(=C(C=C7CCN6C)OC)O)OC)OC	C37H40N2O6	608.72	45	24	0.35	3	8	1	181.60	72.86	5.02	6.34	5.45	3.55	5.50	5.17	-7.80	9.54e-06	1.57e-08	Poorly soluble	-7.66	1.33e-05	2.19e-08	Poorly soluble	-10.12	4.61e-08	7.57e-11	Insoluble	High	No	No	No	No	No	No	No	-5.51	1	3	0	0	2	0.55	0	0	2
Spike protein interaction	Flavonoid	Fisetin	C1=CC(=C(C=C1C2=C(C(=O)C3=C(O2)C=C(C=C3)O)O)O)O	C15H10O6	286.24	21	16	0.00	1	6	4	76.01	111.13	1.50	1.97	2.28	-0.03	2.03	1.55	-3.35	1.27e-01	4.43e-04	Soluble	-3.93	3.37e-02	1.18e-04	Soluble	-3.82	4.29e-02	1.50e-04	Soluble	High	No	No	Yes	No	No	Yes	Yes	-6.65	0	0	0	0	0	0.55	1	1	0
Spike protein interaction	Flavonoid	Isolophirachalcone A	C1=CC(=CC=C1CC2C(C(OC2C3=CC(=C(C=C3O)O)C(C4C(OC5=C4C=C(C=C5)C=CC(=O)C6=C(C=C(C=C6)O)O)C7=CC=C(C=C7)O)C8=C(C=C(C=C8)O)O)C9=CC=C(C=C9)O)C(=O)C1=C(C=C(C=C1)O)O)O	C60H48O15	1009.01	75	48	0.13	13	15	11	277.97	275.13	2.32	10.17	9.48	2.02	7.79	6.36	-12.12	7.68e-10	7.61e-13	Insoluble	-15.88	1.32e-13	1.31e-16	Insoluble	-12.93	1.18e-10	1.17e-13	Insoluble	Low	No	Yes	No	No	No	No	No	-5.23	3	4	2	2	6	0.17	0	1	3
Spike protein interaction	Terpenoid	Nimbin	CC1=C2C(CC1C3=COC=C3)OC4C2(C(C5(C(C4OC(=O)C)C(C=CC5=O)(C)C(=O)OC)C)CC(=O)OC)C	C30H36O9	540.60	39	5	0.60	8	9	0	138.81	118.34	3.95	2.28	3.92	2.04	3.96	3.23	-4.20	3.45e-02	6.38e-05	Moderately soluble	-4.40	2.14e-02	3.96e-05	Moderately soluble	-5.44	1.97e-03	3.64e-06	Moderately soluble	High	No	No	No	No	No	No	No	-7.98	1	3	0	0	0	0.55	0	2	2
Spike protein interaction	Flavonoid	Quercetin	C1=CC(=C(C=C1C2=C(C(=O)C3=C(C=C(C=C3O2)O)O)O)O)O	C15H10O7	302.24	22	16	0.00	1	7	5	78.03	131.36	1.63	1.54	1.99	-0.56	1.54	1.23	-3.16	2.11e-01	6.98e-04	Soluble	-3.91	3.74e-02	1.24e-04	Soluble	-3.24	1.73e-01	5.73e-04	Soluble	High	No	No	Yes	No	No	Yes	Yes	-7.05	0	0	0	0	0	0.55	1	1	0
Spike protein interaction	Terpenoid	Saikosaponin	CC1C(C(C(C(O1)OC2CCC3(C(C2(C)CO)CCC4(C3C=CC56C4(CC(C7(C5CC(CC7)(C)C)CO6)O)C)C)C)O)OC8C(C(C(C(O8)CO)O)O)O)O	C42H68O13	780.98	55	0	0.95	6	13	8	199.82	207.99	4.90	2.52	1.78	0.18	1.14	2.10	-5.87	1.04e-03	1.34e-06	Moderately soluble	-6.53	2.28e-04	2.92e-07	Poorly soluble	-2.08	6.50e+00	8.32e-03	Soluble	Low	No	Yes	No	No	No	No	No	-9.27	3	3	1	1	5	0.17	0	2	1
Spike protein interaction	Alkaloid	Tetrandrine	CN1CCC2=CC(=C3C=C2C1CC4=CC=C(C=C4)OC5=C(C=CC(=C5)CC6C7=C(O3)C(=C(C=C7CCN6C)OC)OC)OC)OC	C38H42N2O6	622.75	46	24	0.37	4	8	0	186.07	61.86	5.16	6.66	5.75	3.73	6.06	5.47	-8.02	5.96e-06	9.57e-09	Poorly soluble	-7.76	1.08e-05	1.73e-08	Poorly soluble	-10.80	9.78e-09	1.57e-11	Insoluble	High	No	No	No	No	No	No	No	-5.37	1	4	0	0	2	0.55	0	0	2
[truncated: 1 more columns]
